# Supplementary material
Source: PubMed Central journal article supplement (PMC4243084)

**Figure S1**

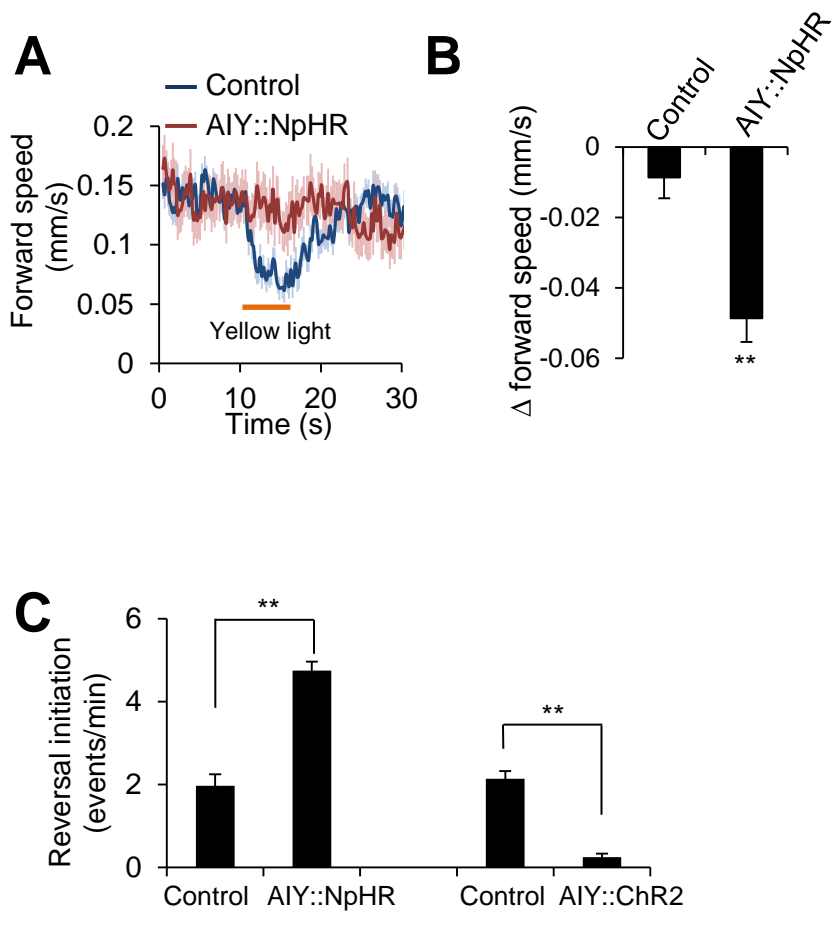

Supplement: NIHMS634074-supplement-1.pdf [file NIHMS634074-supplement-1.pdf]

Figure S2

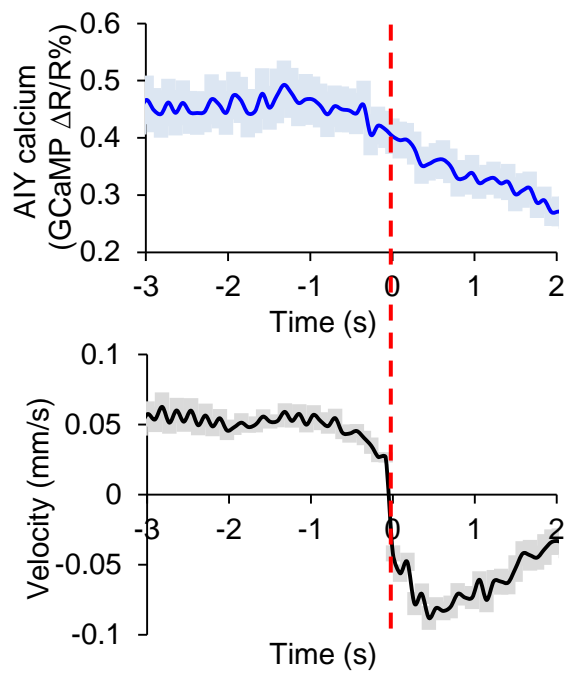

Supplement: NIHMS634074-supplement-2.pdf [file NIHMS634074-supplement-2.pdf]

# Figure S3

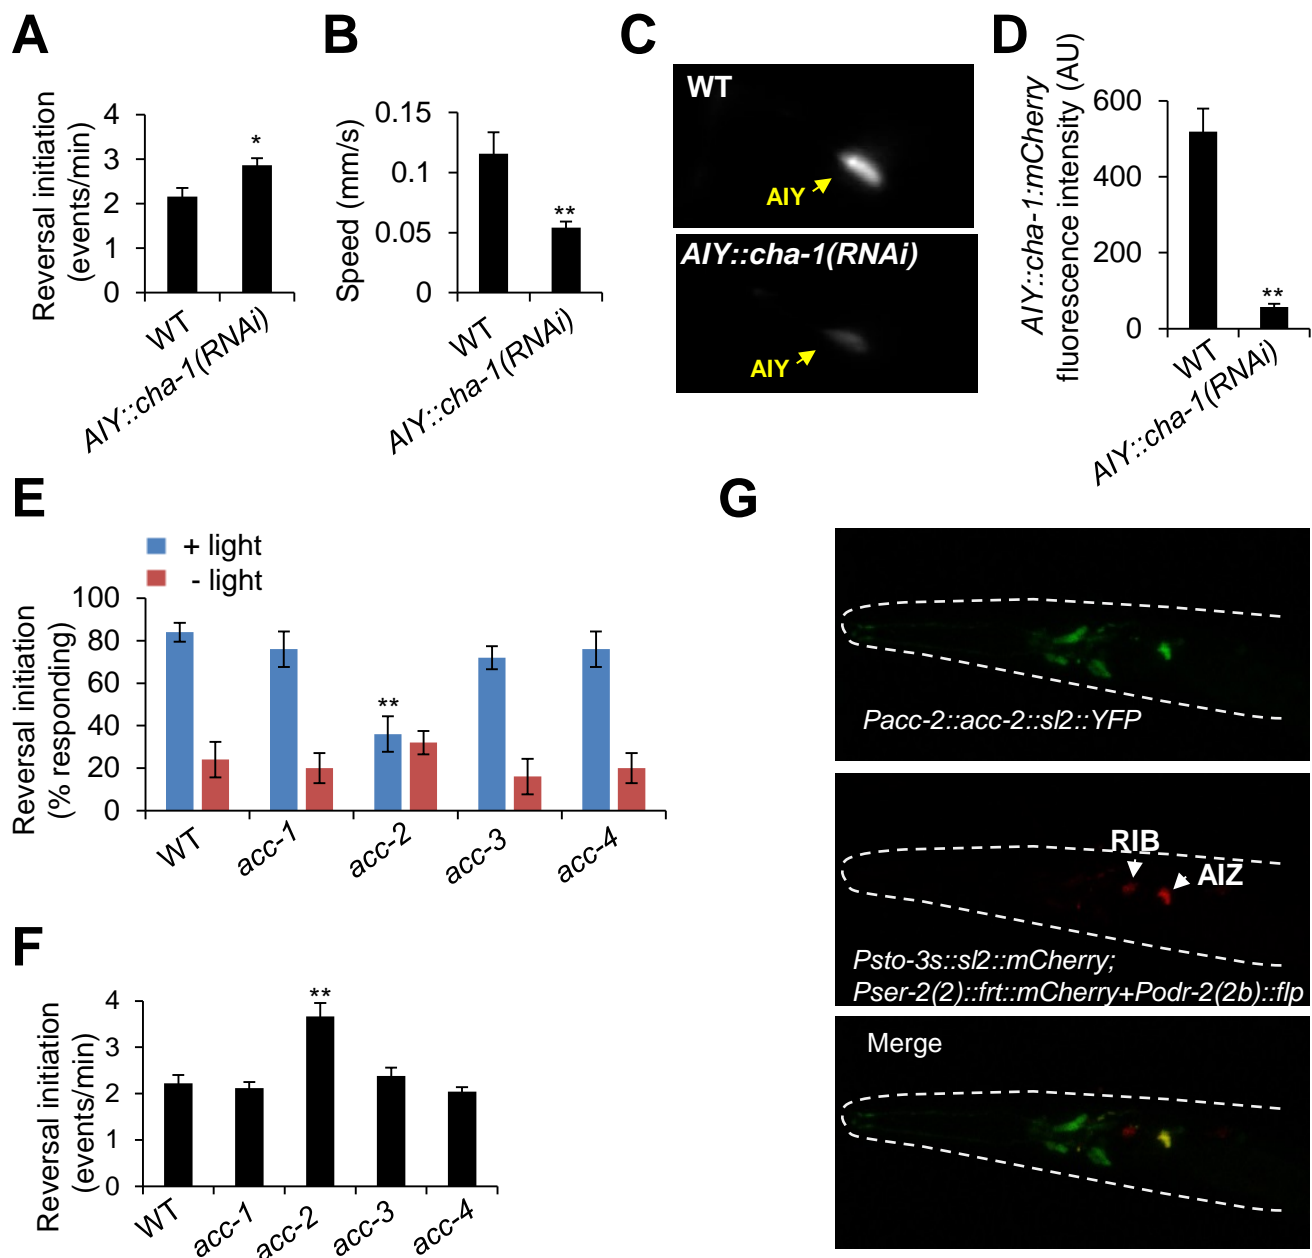

Supplement: NIHMS634074-supplement-3.pdf [file NIHMS634074-supplement-3.pdf]
